# Supplementary material for: Graves’ ophthalmopathy: the clinical and psychosocial outcomes of different medical interventions – a systematic review
Source: PubMed Central journal article supplement (PMC11184183; doi:10.1136/bmjophth-2023-001515), 2024-06-17

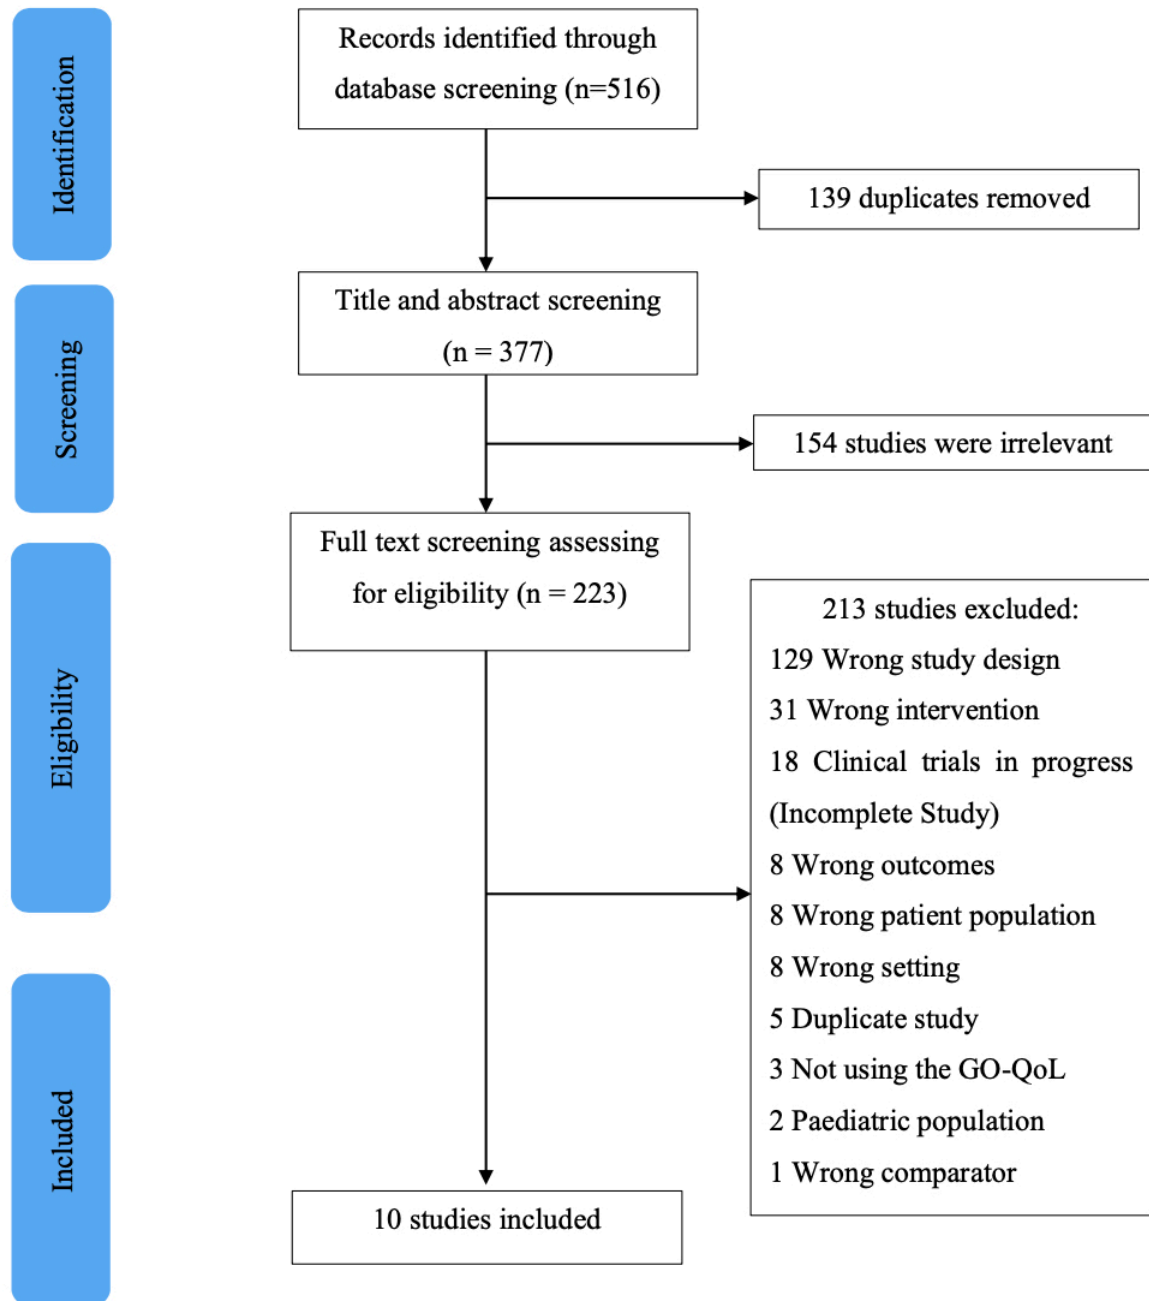

Supplement: bmjophth-2023-001515supp001.pdf [file bmjophth-2023-001515supp001.pdf]
