# Supplementary material for: Graves’ ophthalmopathy: the clinical and psychosocial outcomes of different medical interventions – a systematic review
Source: PubMed Central journal article supplement (PMC11184183; doi:10.1136/bmjophth-2023-001515), 2024-06-17
Supplement: bmjophth-2023-001515supp002.pdf [file bmjophth-2023-001515supp002.pdf]

## **Supplementary Tables**

**Data Search Summary Characteristics of Studies (Table 1)**

**Quality of Life – Data Extraction Table (Table 2)**

**Secondary Outcomes Data Extraction Table (Table 3)**

**Data Search Summary Characteristics of Studies (Table**

| Study No: | Author & Date            | Study Title                                                                                                                                                      | Study Design                               | Number of Participants | Control Group | Treatment type & Administration                                      | Follow up period    | Conclusion of Study                                                                                                        | Downs & Black Quality Assessment Score /28 |
|-----------|--------------------------|------------------------------------------------------------------------------------------------------------------------------------------------------------------|--------------------------------------------|------------------------|---------------|----------------------------------------------------------------------|---------------------|----------------------------------------------------------------------------------------------------------------------------|--------------------------------------------|
| 1         | (Bartalena et al., 2012) | Efficacy and safety of three different cumulative doses of intravenous methylprednisolone for moderate to severe and active Graves' orbitopathy (1)              | Multi-centre Randomised double-blind trial | 159                    | No            | Cumulative dose of either 2.25g, 4.98g, 7.47g in 12 weekly infusions | 6, 12 and 24 weeks  | Cumulative dose of 7.47g provides a short-term advantage over lower doses but is associated with slightly greater toxicity | 26                                         |
| 2         | (Tsirouki et al., 2016)  | Clinical and imaging evaluation of the response to intravenous steroids in patients with Graves' orbitopathy and analysis on who requires additional therapy (2) | Prospective cohort study                   | 42                     | No            | Cumulative dose of 4.5g in 12 weekly infusions                       | 12 and 24 weeks     | In patients with active GO. IV methylprednisolone is an effective regimen with low adverse effects and recurrence          | 20                                         |
| 3         | (Hoppe et al., 2020)     | Predictive Factors for Changes in Quality of Life after Steroid Treatment for Active Moderate-to-Severe Graves' Orbitopathy: A                                   | Prospective follow-up study                | 100                    | No            | Cumulative dose of 4.5g in 12 weekly infusions                       | 12, 24 and 36 weeks | Treatment with IV steroids is a predictive factor for changes in the GO-QoL questionnaire                                  | 18                                         |

|   |                          |                                                                                                                                                      |                               |    |    |                                                                                  |                                |                                                                                                                    |    |
|---|--------------------------|------------------------------------------------------------------------------------------------------------------------------------------------------|-------------------------------|----|----|----------------------------------------------------------------------------------|--------------------------------|--------------------------------------------------------------------------------------------------------------------|----|
|   |                          | Prospective Trial (3)                                                                                                                                |                               |    |    |                                                                                  |                                |                                                                                                                    |    |
| 4 | (Terwee et al., 2001)    | Interpretation and validity of changes in scores on the Graves' ophthalmopathy quality of life questionnaire (GO-QOL) after different treatments (4) | Prospective Cohort studies    | 23 | No |                                                                                  | 24weeks                        | For invasive therapies, a change of at least 10 points is recommended as a minimal clinically important difference | 16 |
| 5 | (Vannucchi et al., 2021) | Efficacy Profile and Safety of Very Low-Dose Rituximab in Patients with Graves' Orbitopathy (5)                                                      | Open-label prospective study  | 17 | No | A single dose of 100mg                                                           | 4,8,12,16,24, 32, 40, 76 weeks | 100mg Rituximab is an effective dose in the management of patients with GO                                         | 17 |
| 6 | (Salvi et al., 2015)     | Efficacy of B-cell targeted therapy with rituximab in patients with active moderate to severe Graves' orbitopathy: a randomized controlled study (6) | Double-blind randomised trial | 32 | No | A cumulative dose of 7.5g IVMP in 12 weekly infusions and RTX 500md or 1000mg X2 | 12,16,24, 52, 76 weeks         | There are better therapeutic outcomes in the management of active GO compared to IV methylprednisolone             | 23 |

|    |                               |                                                                                                                                           |                                                  |    |     |                                                                                |                     |                                                                                                                                                              |    |
|----|-------------------------------|-------------------------------------------------------------------------------------------------------------------------------------------|--------------------------------------------------|----|-----|--------------------------------------------------------------------------------|---------------------|--------------------------------------------------------------------------------------------------------------------------------------------------------------|----|
| 7  | (Perez-Moreiras et al., 2018) | Efficacy of Tocilizumab in Patients with Moderate-to-Severe Corticosteroid-Resistant Graves' Orbitopathy: A Randomized Clinical Trial (7) | Double-blind randomised placebo control trial    | 32 | Yes | 8mg/kg intravenous tocilizumab                                                 | 16, 40 weeks        | Tocilizumab offers meaningful improvement in activity and severity in corticosteroid-resistant GO                                                            | 27 |
| 8  | (Smith et al., 2017)          | Teprotumumab for Thyroid-Associated Ophthalmopathy (8)                                                                                    | Double masked randomised placebo control trial   | 88 | Yes | 10mg/kg of teprotumumab for initial infusion the 20mg/kg remaining 7 infusions | 6, 12, 18, 24 weeks | Teprotumumab is more effective than placebo in improving proptosis and CAS                                                                                   | 26 |
| 9  | (Douglas et al., 2020)        | Teprotumumab for the Treatment of Active Thyroid Eye Disease (9)                                                                          | Double masked randomised placebo control trial   | 83 | Yes | 10mg/kg of teprotumumab for initial infusion the 20mg/kg remaining 7 infusions | 6, 12, 18, 24 weeks | Teprotumumab is more effective than placebo in improving proptosis, diplopia, quality of life and CAS                                                        | 26 |
| 10 | (Douglas et al., 2022)        | Teprotumumab Efficacy, Safety, and Durability in Longer-Duration Thyroid Eye Disease and Re-treatment: OPTIC-X Study (10)                 | An open-label clinical extension follow-up study | 36 | No  | 10mg/kg of teprotumumab for initial infusion the 20mg/kg remaining 7 infusions | 4, 12, 24 weeks     | Patients with TED of longer disease duration respond similarly to those treated earlier therefore, patients may benefit from additional teprotumumab therapy | 18 |

### Quality of Life – Data Extraction Table (Table 2)

**N.B: Rows in bold indicate the different time periods when the follow-up appointments were conducted**

| Study No: | Intervention         | Number of Participants | GO-QoL Visual Functioning score at different time periods |                  |                  |                 |                | GO-QoL Appearance score at different time periods |                 |                 |                 |                |
|-----------|----------------------|------------------------|-----------------------------------------------------------|------------------|------------------|-----------------|----------------|---------------------------------------------------|-----------------|-----------------|-----------------|----------------|
|           |                      |                        | 0 Weeks                                                   | 6 weeks          | 12 Weeks         | 24 weeks        | P Value        | 0 Weeks                                           | 6 weeks         | 12 Weeks        | 24 weeks        | P value        |
| <b>1</b>  | 2.25g IVMP           | 53                     | 59 ± 30                                                   | 2.1 (-3.4; 7.6)  | 5.8 (0.3;11.3)   |                 | 0.11           | 62 ± 25                                           | 5.2 (0.7; 9.6)  | 7.6 (3.2;12)    |                 | 0.003          |
|           | 4.98g IVMP           | 54                     | 55 ± 29                                                   | 4.7 (-0.7; 10.2) | 10.1 (4.7;15.5)  |                 | 0.001          | 70 ± 18                                           | 1.9 (-2.5; 6.3) | 3.3 (-1.1; 7.6) |                 | 0.3            |
|           | 7.47g IVMP           | 53                     | 51 ± 29                                                   | 7.3 (1.8; 12.9)  | 12.8 (7.2; 18.3) |                 | <0.0001        | 62 ± 23                                           | 3.8 (-0.7; 8.2) | 9.0 (4.5; 13.5) |                 | <0.0001        |
| <b>2</b>  | 4.5g IVMP            | 42                     | 4.21 ± 1.360                                              |                  | 5.69 ± 2.646     | 8.43 ± 2.154    | <0.001         | 4.79 ± 2.926                                      |                 | 4.79 ± 2.926    | 7.19 ± 2.998    | <0.001         |
|           |                      |                        | <b>0 Weeks</b>                                            | <b>12 weeks</b>  | <b>24 Weeks</b>  | <b>36 weeks</b> | <b>P Value</b> | <b>0 Weeks</b>                                    | <b>12 weeks</b> | <b>24 Weeks</b> | <b>36 weeks</b> | <b>P value</b> |
| <b>3</b>  | 4.5g IVMP            | 100                    | 66.5 (24.5)                                               | 66.1 (23.2)      | 69.6 (24.9)      | 72.2 (25.8)     | 0.04           | 63.7 (21.6)                                       | 71.3 (22.8)     | 71.1 (25.5)     | 71.4 (26.3)     | 0.005          |
| <b>4</b>  | Orbital Radiotherapy | 23                     | 37.0 (20.7)                                               |                  |                  | 45.1 (26.9)     | 0.05           | 72.0 (18.6)                                       |                 |                 | 73.6 (22.7)     | 0.61           |

|           |                                     |    |                    |                 |                  |                  |                |                  |                 |                    |                  |                |
|-----------|-------------------------------------|----|--------------------|-----------------|------------------|------------------|----------------|------------------|-----------------|--------------------|------------------|----------------|
| <b>5</b>  | 100mg                               | 17 | 56.4 ± 9.7         |                 |                  | 52.0 ± 9.8       |                | 56.6 ± 6.3       |                 |                    | 71.6 ± 4.6       |                |
| <b>6</b>  | 4.5g IVMP                           | 16 |                    |                 |                  |                  |                |                  | P = 0.39        |                    |                  |                |
|           | 500mg RTX                           | 15 |                    | P = 0.058       |                  |                  |                |                  |                 |                    |                  |                |
|           |                                     |    | <b>0 Weeks</b>     | <b>12 weeks</b> | <b>16 Weeks</b>  | <b>40 weeks</b>  | <b>P Value</b> | <b>0 Weeks</b>   | <b>12 weeks</b> | <b>16 Weeks</b>    | <b>40 weeks</b>  | <b>P value</b> |
| <b>7</b>  | Placebo                             | 17 | 25.0 (16.7 – 44.0) |                 | 35.2 (17.3-58.7) | 35.2 (17.3-58.7) |                | 45.0 (30.0-65.0) |                 | 17.6 (6.1-41.0)    | 29.4 (13.2-53.1) |                |
|           | Tocilizumab                         | 15 | 72.2 (38.9 – 83.3) |                 | 46.7 (24.8-69.9) | 46.7 (24.8-69.9) |                | 50.0 (45.0-55.0) |                 | 40.0 (19.9 – 64.2) | 33.3 (15.1-58.2) |                |
|           |                                     |    | <b>0 Weeks</b>     | <b>6 weeks</b>  | <b>12 Weeks</b>  | <b>24 weeks</b>  | <b>P Value</b> | <b>0 Weeks</b>   | <b>6 weeks</b>  | <b>12 Weeks</b>    | <b>24 weeks</b>  | <b>P value</b> |
| <b>8</b>  | Placebo                             | 45 | 17.8 ± 4.3         |                 |                  | 7.5 ± 2.7        |                | 16.7 ± 3.8       |                 |                    | 6.6 ± 2.7        |                |
|           | Teprotumumab                        | 42 | 16.9 ± 4.4         |                 |                  | 21.7 ± 2.9       | <0.001         | 17.6 ± 4.5       |                 |                    | 12.9 ± 2.8       | 0.10           |
| <b>9</b>  | Placebo                             | 42 |                    | 6.33            | 5.16             | 1.80             |                |                  | 6.33            | 5.16               | 1.80             |                |
|           | Teprotumumab                        | 41 |                    | 10.18           | 13.91            | 17.28            | <0.001         |                  | 10.18           | 13.91              | 17.28            | <0.001         |
| <b>10</b> | Teprotumumab 1 <sup>st</sup> Course | 36 | 70.2               | 91.7            | 92.4             | 95.3             |                | 85.0             | 86.3            | 89.1               | 91.7             |                |
|           | Teprotumumab Retreatment            | 14 | 63.8               | 77.5            | 79.7             | 81.3             |                | 66.0             | 68.1            | 68.1               | 69.5             |                |

Secondary Outcomes Data Extraction Table (Table 3)

| Study No: | Intervention | No: of Participants | CAS at different time periods |              |         | Proptosis (mm) at different time periods |                    |         | Diplopia (0/1/2/3) at different time periods |          |         | Adverse Events |                                                                        |
|-----------|--------------|---------------------|-------------------------------|--------------|---------|------------------------------------------|--------------------|---------|----------------------------------------------|----------|---------|----------------|------------------------------------------------------------------------|
|           |              |                     | 0 Weeks                       | 12 Weeks     | P Value | 0 Weeks                                  | 12 Weeks           | P value | 0 Weeks                                      | 24 Weeks | P Value | Adverse Events | Serious Adverse Events                                                 |
| 1         | 2.25g IVMP   | 53                  | 4                             | -1.8 ± 1.6   | <0.0001 | 23.3 ± 3.2                               | -0.8 (-1.2; -0.4)  | 0.001   | 17/11/16/9                                   |          |         | 12 patients    | 2 patients                                                             |
|           | 4.98g IVMP   | 54                  | 4                             | -2.3 ± 1.4   | <0.0001 | 22.2 ± 3.0                               | -0.4 (-0.8; -0.01) | 0.1     | 14/11/20/9                                   |          |         | 18 patients    | 3 patients                                                             |
|           | 7.47g IVMP   | 53                  | 5                             | -2.7 ± 1.5   | <0.0001 | 22.5 ± 3.8                               | -0.6 (-1; -0.2)    | 0.01    | 15/11/14/12                                  |          |         | 14 patients    | 5 patients                                                             |
|           |              |                     | 0 Weeks                       | 24 Weeks     | P Value | 0 Weeks                                  | 24 Weeks           | P value | 0 Weeks                                      | 24 Weeks | P Value |                |                                                                        |
| 2         | 4.5g IVMP    | 42                  | 6.05 ± 1.229                  | 1.21 ± 1.440 | <0.001  |                                          |                    |         |                                              |          |         |                | 3 patients (1 herpes zoster infection and 2 electrolyte abnormalities) |
| 3         | 4.5g IVMP    | 100                 | 4                             |              |         | 21.8 ± 3.2                               |                    |         | 32/24/28/16                                  |          |         |                |                                                                        |

|   |                      |    |             |           |         |                                  |                                  |         |          |          |         |                          |                                            |
|---|----------------------|----|-------------|-----------|---------|----------------------------------|----------------------------------|---------|----------|----------|---------|--------------------------|--------------------------------------------|
| 4 | Orbital radiotherapy | 23 |             |           |         | 19.4 ± 4.1                       | 18.9 ± 3.7                       | 0.26    | 4/0/7/10 | 5/2/6/8  | 0.32    |                          |                                            |
| 5 | 100mg RTX            | 17 | 4.6 ± 0.3   | 1.1 ± 0.2 | <0.0001 | RE: 23.8 ± 0.7<br>LE: 23.6 ± 1.0 | RE: 22.6 ± 0.8<br>LE: 23.0 ± 0.9 |         | 4/4/2/4  |          |         | 1 case of mild urticaria | 1 case of Syndrome of release of cytokines |
| 6 | 4.5g IVMP            | 16 | 4.7 ± 0.7   | 2.3 ± 0.5 | <0.006  | RE: 22.8 ± 3.3<br>LE: 22.5 ± 3.7 |                                  | NS      | 5/4/3/4  |          | NS      | 7 patients               | 3 patients                                 |
|   | 500mg RTX            | 15 | 4.4 ± 0.7   | 0.6 ± 3   | <0.006  | RE: 23.2 ± 2.5<br>LE: 23.5 ± 3.5 |                                  | NS      | 5/3/5/1  |          | NS      | 11 patients              | 2 patients                                 |
|   |                      |    | 0 Weeks     | 40 Weeks  | P Value | 0 Weeks                          | 40 Weeks                         | P value | 0 Weeks  | 40 Weeks | P Value |                          |                                            |
| 7 | Placebo              | 17 | 5 (4.0-6.0) |           |         | 22 (19.5, 24)                    | 23.2 (19, 24)                    |         |          |          |         | 17 patients              | 0 patients                                 |
|   | Tocilizumab          | 15 | 5 (5.0-7.0) |           | >0.05   | 21 (19.5, 23)                    | 20.7 (18.5, 22)                  | 0.04    |          |          |         | 13 patients              | 2 patients                                 |



|           |                                     |    | 0 Weeks    | 24 Weeks                       | P Value | 0 Weeks      | 24 Weeks            | P value | 0 Weeks   | 24 Weeks                                     | P Value |                     |                   |
|-----------|-------------------------------------|----|------------|--------------------------------|---------|--------------|---------------------|---------|-----------|----------------------------------------------|---------|---------------------|-------------------|
| <b>8</b>  | Placebo                             | 45 | 5.2 ± 0.74 | -1.85 ± 0.17                   |         | 23.1 ± 2.9   | -0.15 ± 0.19        |         | 14/19/8/4 | 18/8/7/6                                     |         | 32 patients         | 1 patient         |
|           | Teprotumumab                        | 42 | 5.1 ± 0.97 | -3.43 ± 0.18                   | <0.001  | -23.4 ± 3.2  | -2.46 ± 0.20        | <0.001  | 4/16/7/15 | 21/4/9/4                                     | <0.001  | 32 patients         | 5 patients        |
| <b>9</b>  | Placebo                             | 42 | 5.3 ± 0.9  | 21% of pts achieving CAS 0,1   |         | 23.20 ± 3.21 | -0.53               |         |           | Reduction in Diplopia by 1 grade: 29% of pts |         | 29 patients         | 1 patient         |
|           | Teprotumumab                        | 41 | 5.1 ± 0.9  | 59% of pts achieving CAS 0,1   | <0.001  | 22.62 ± 3.32 | -3.32               | <0.001  |           | Reduction in Diplopia by 1 grade: 68% of pts | P=0.001 | 35 patients         | 2 patients        |
| <b>10</b> | Teprotumumab 1 <sup>st</sup> Course | 36 | 3.6 ± 1.7  | 65.6% of pts achieving CAS 0,1 |         | 23.0 ± 3.1   | 1-1.5mm improvement |         |           |                                              |         | 32 patients (86.5%) | 3 patients (8.1%) |
|           | Teprotumumab Retreatment            | 14 | 3.5 ± 1.6  |                                |         | 21.0 ± 4.2   | 2mm improvement     |         |           |                                              |         | 11 patients (78.6%) | 1 patient (7.1%)  |

**N.B: Rows in bold indicate the different time periods when the follow-up appointments were conducted**

## References

1. Bartalena L, Krassas GE, Wiersinga W, Marcocci C, Salvi M, Daumerie C, et al. Efficacy and safety of three different cumulative doses of intravenous methylprednisolone for moderate to severe and active Graves' orbitopathy. *Journal of Clinical Endocrinology and Metabolism*. 2012;97(12):4454-63.
2. Tsirouki T, Bargiota A, Tigas S, Vasileiou A, Kapsalaki E, Giotaki Z, et al. Clinical and imaging evaluation of the response to intravenous steroids in patients with graves' orbitopathy and analysis on who requires additional therapy. *Clinical Ophthalmology*. 2016;10:2277-89.
3. Hoppe E, Lee ACH, Hoppe D, Kahaly GJ. Predictive Factors for Changes in Quality of Life after Steroid Treatment for Active Moderate-to-Severe Graves' Orbitopathy: A Prospective Trial. *European Thyroid Journal*. 2021;9(6):313-20.
4. Terwee CB, Dekker FW, Mourits MP, Gerding MN, Baldeschi L, Kalmann R, et al. Interpretation and validity of changes in scores on the Graves' ophthalmopathy quality of life questionnaire (GO-QOL) after different treatments. *Clinical endocrinology*. 2001;54(3):391-8.
5. Vannucchi G, Campi I, Covelli D, Curro N, Lazzaroni E, Palomba A, et al. Efficacy Profile and Safety of Very Low-Dose Rituximab in Patients with Graves' Orbitopathy. *Thyroid*. 2021;31(5):821-8.
6. Salvi M, Vannucchi G, Curro N, Campi I, Covelli D, Dazzi D, et al. Efficacy of B-cell targeted therapy with rituximab in patients with active moderate to severe graves' orbitopathy: A randomized controlled study. *Journal of Clinical Endocrinology and Metabolism*. 2015;100(2):422-31.
7. Perez-Moreiras JV, Gomez-Reino JJ, Maneiro JR, Perez-Pampin E, Romo Lopez A, Rodriguez Alvarez FM, et al. Efficacy of Tocilizumab in Patients With Moderate-to-Severe Corticosteroid-Resistant Graves Orbitopathy: A Randomized Clinical Trial. *Am J Ophthalmol*. 2018;195:181-90.
8. Smith TJ, Kahaly GJ, Ezra DG, Fleming JC, Dailey RA, Tang RA, et al. Teprotumumab for Thyroid-Associated Ophthalmopathy. *New England journal of medicine*. 2017;376(18):1748-61.
9. Douglas RS, Kahaly GJ, Patel A, Sile S, Thompson EH, Perdok R, et al. Teprotumumab for the Treatment of Active Thyroid Eye Disease. *N Engl J Med*. 2020;382(4):341-52.
10. Douglas RS, Kahaly GJ, Ugradar S, Elflein H, Ponto KA, Fowler BT, et al. Teprotumumab Efficacy, Safety, and Durability in Longer-Duration Thyroid Eye Disease and Re-treatment: OPTIC-X Study. *Ophthalmology*. 2022;129(4):438-49.
